# Supplementary material for: Characterization, thermal and mechanical properties and hydrophobicity of resorcinol-furfural/silicone hybrid aerogels synthesized by ambient-pressure drying
Source: Royal Society of Chemistry journal article supplement (doi:10.1039/c6ra09557g), 2016-01-01
Supplement: c6ra09557g1.pdf [file c6ra09557g1.pdf]

## Supplementary Material for

### Characterization, thermal, mechanical properties and hydrophobicity of resorcinol-furfural/silicone hybrid aerogels synthesized by ambient-pressure drying

Haiming Cheng,\* Huafei Xue, Changqing Hong,\* Xinghong Zhang

National Key Laboratory of Science and Technology on Advanced Composites in Special Environments, Harbin Institute of Technology, Harbin 150001, P.R. China

\*Corresponding author: Tel/fax: +86-451-86403016

E-mail address: hmingcheng@yeah.net (H.M. Cheng), hongcq@hit.edu.cn (C.Q. Hong)

Table S1 RF and Si-RF aerogels element content, derived from the XPS analysis.

| Sample   | C     | N    | O     | Si    |
|----------|-------|------|-------|-------|
| RF       | 72.75 | 1.55 | 25.70 | 0     |
| Si0.2-RF | 61.23 | 3.04 | 23.13 | 12.59 |
| Si0.4-RF | 54.84 | 3.61 | 23.79 | 17.77 |
| Si0.6-RF | 51.25 | 4.33 | 24.13 | 20.29 |

Table S2 XPS analysis data of RF and Si-RF aerogels.

| Sample   | Binding Energy Peak(eV) | Peak Area | Peak Area Ratio | Chemical bond |
|----------|-------------------------|-----------|-----------------|---------------|
| RF       | 399.32                  | 1894.045  | 100%            | HNC2          |
| Si0.6-RF | 399.38                  | 3081.765  | 54.87%          | HNC2          |
|          | 400.47                  | 2534.864  | 45.13%          | NC3           |

**Table S3** Compressive properties of CBCF/RF and CBCF/Si-RF aerogel composites.

| Sample        | Z direction |              | XY direction |               |
|---------------|-------------|--------------|--------------|---------------|
|               | Strength    | Modulus      | Strength     | Modulus       |
|               | (MPa)       | (MPa)        | (MPa)        | (MPa)         |
| CBCF/RF       | 0.577±0.043 | 18.733±2.566 | 1.337±0.113  | 42.212±8.307  |
| CBCF/Si0.2-RF | 0.759±0.054 | 15.329±0.560 | 1.637±0.252  | 48.381±9.019  |
| CBCF/Si0.4-RF | 0.823±0.052 | 17.200±1.648 | 2.053±0.116  | 58.867±14.503 |
| CBCF/Si0.6-RF | 0.927±0.052 | 17.214±2.368 | 2.940±0.505  | 80.147±7.584  |
